# Supplementary material for: Sexual health and testosterone concentration in male lymphoma survivors: A systematic review
Source: PubMed Central journal article supplement — Heliyon. 2024 Jun 4;10(11):e31915. doi: 10.1016/j.heliyon.2024.e31915 (PMC11219276; doi:10.1016/j.heliyon.2024.e31915), 2024-06-04
Supplement: mmc3.pdf [file mmc3.pdf]

# Sexual health and testosterone concentration in male lymphoma survivors: A systematic review

Supplementary data provided by Behringer et al.

Title: Sexual quality of life in Hodgkin Lymphoma: A longitudinal analysis by the German Hodgkin Study Group

Behringer, Karolin  
Müller, H  
Flechtner, H.-H.  
Brillant, C  
Halbsguth, T V  
Thielen, I  
Eichenauer, D. A.  
Schober, T  
Nisters-Backes, H  
Fuchs, M  
Engert, A  
Borchmann, P

## Supplementary data for adult men with Hodgkin lymphoma:

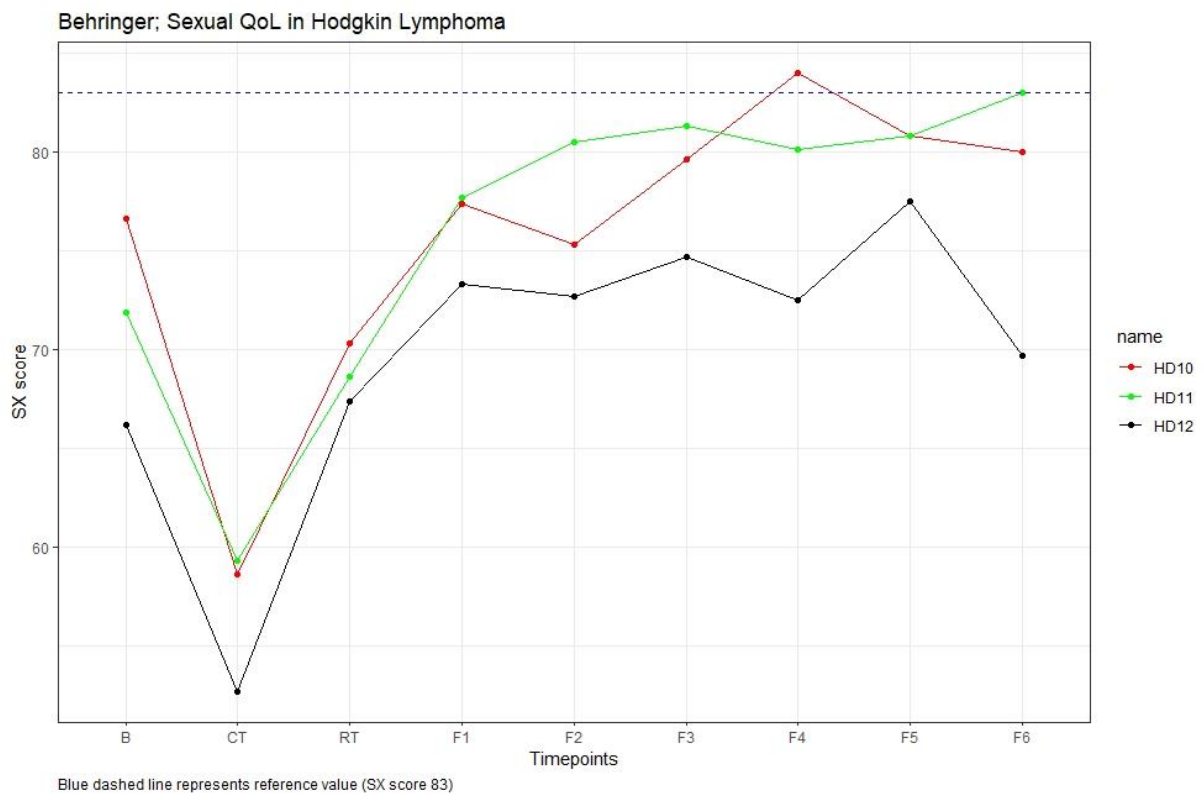

HM, 28.11.2022

Mean values of sexual functioning in males of the HD10 trial (normal reference level= 83)

| time | Mean    | N   | Std.-deviation |
|------|---------|-----|----------------|
| 1    | 76,5636 | 485 | 29,71529       |
| 2    | 58,5594 | 344 | 33,39190       |
| 3    | 70,2827 | 338 | 32,61789       |
| 4    | 77,3558 | 158 | 28,89504       |
| 5    | 75,2739 | 142 | 30,39000       |
| 6    | 79,6296 | 120 | 27,22926       |
| 7    | 83,9506 | 108 | 23,64761       |
| 8    | 80,8279 | 102 | 27,84510       |
| 9    | 79,9458 | 82  | 30,16184       |

Mean values of sexual functioning in males of the HD11 trial (normal reference level= 83)

| time | Mean    | N   | Std.-deviation |
|------|---------|-----|----------------|
| 1    | 71,8891 | 467 | 30,54669       |
| 2    | 59,3281 | 296 | 31,42782       |
| 3    | 68,6343 | 288 | 29,96943       |
| 4    | 77,6930 | 131 | 25,94816       |
| 5    | 80,5333 | 125 | 23,76608       |
| 6    | 81,2500 | 96  | 23,87494       |
| 7    | 80,1235 | 90  | 24,16561       |
| 8    | 80,8081 | 88  | 26,88751       |
| 9    | 83,0303 | 55  | 20,38210       |

Mean values of sexual functioning in males of the HD12 trial (normal reference level= 83)

| time | Mean    | N   | Std.-deviation |
|------|---------|-----|----------------|
| 1    | 66,2160 | 641 | 33,67431       |
| 2    | 52,7051 | 382 | 34,34764       |
| 3    | 67,4155 | 230 | 32,62390       |
| 4    | 73,3200 | 167 | 31,14312       |
| 5    | 72,6667 | 150 | 32,86093       |
| 6    | 74,7346 | 157 | 30,54873       |
| 7    | 72,5146 | 133 | 30,63058       |
| 8    | 77,4854 | 114 | 29,24673       |
| 9    | 69,6732 | 85  | 33,43847       |
