# Supplementary material for: Sexual health and testosterone concentration in male lymphoma survivors: A systematic review
Source: PubMed Central journal article supplement — Heliyon. 2024 Jun 4;10(11):e31915. doi: 10.1016/j.heliyon.2024.e31915 (PMC11219276; doi:10.1016/j.heliyon.2024.e31915), 2024-06-04
Supplement: mmc4.pdf [file mmc4.pdf]

# Sexual health and testosterone concentration in male lymphoma survivors: A systematic review

Supplementary data provided by Gan et al.

Title: Erectile dysfunction in male lymphoma survivors in a Southeast Asian country

Gan, GG  
Ng, D.L.C.  
Leong, Y.C.

**Supplementary data for adult men with HL treated with chemotherapy.**

## Descriptive Statistics

|                    | N   | Minimum | Maximum | Mean  | Std. Deviation |
|--------------------|-----|---------|---------|-------|----------------|
| Age group          | 104 | 1       | 2       | 1.61  | .491           |
| Age                | 104 | 18      | 85      | 54.93 | 15.345         |
| Valid N (listwise) | 104 |         |         |       |                |

## Case Processing Summary

|              | Valid |         | Cases Missing |         | Total |         |
|--------------|-------|---------|---------------|---------|-------|---------|
|              | N     | Percent | N             | Percent | N     | Percent |
| ED score all | 104   | 100.0%  | 0             | 0.0%    | 104   | 100.0%  |

### Descriptives

|              |                                     | Statistic   | Std. Error |  |
|--------------|-------------------------------------|-------------|------------|--|
| ED score all | Mean                                | 11.91       | .838       |  |
|              | 95% Confidence Interval<br>for Mean | Lower Bound | 10.25      |  |
|              |                                     | Upper Bound | 13.58      |  |
|              | 5% Trimmed Mean                     | 11.86       |            |  |
|              | Median                              | 15.00       |            |  |
|              | Variance                            | 73.109      |            |  |
|              | Std. Deviation                      | 8.550       |            |  |
|              | Minimum                             | 0           |            |  |
|              | Maximum                             | 25          |            |  |
|              | Range                               | 25          |            |  |
|              | Interquartile Range                 | 16          |            |  |
|              | Skewness                            | -.205       | .237       |  |
|              | Kurtosis                            | -1.475      | .469       |  |

### ED group

|       |                           | Frequency | Percent | Valid Percent | Cumulative<br>Percent |
|-------|---------------------------|-----------|---------|---------------|-----------------------|
| Valid | No ED                     | 13        | 12.5    | 12.5          | 12.5                  |
|       | Yes ED                    | 56        | 53.8    | 53.8          | 66.3                  |
|       | not sexually active (< 5) | 35        | 33.7    | 33.7          | 100.0                 |
|       | Total                     | 104       | 100.0   | 100.0         |                       |
