# Supplementary material for: Sexual health and testosterone concentration in male lymphoma survivors: A systematic review
Source: PubMed Central journal article supplement — Heliyon. 2024 Jun 4;10(11):e31915. doi: 10.1016/j.heliyon.2024.e31915 (PMC11219276; doi:10.1016/j.heliyon.2024.e31915), 2024-06-04
Supplement: mmc5.pdf [file mmc5.pdf]

# Sexual health and testosterone concentration in male lymphoma survivors: A systematic review

Supplementary material provided by Mütsch et al.

Title: Sexuality and cancer in adolescents and young adults - A comparison between reproductive cancer patients and patients with non-reproductive cancer

Mütsch, Julian  
Friedrich, Michael  
Leuteritz, Katja  
Sender, Annekathrin  
Geue, Kristina  
Hilbert, Anja  
Stöbel-Richter, Yve

## Supplementary data for adult men with Hodgkin lymphoma treated with chemotherapy and a valid FLZMb-sex questionnaire:

Mean age at diagnosis: 26, range 18-39  
Mean age at inclusion: 27, range 18-41  
Mean follow-up since diagnosis in months: 11, range 2-40

NB: The mean follow-up is 11 months with a range of 2-40 months. All survivors had to have completed primary treatment according to the study inclusion criteria. However, few lymphoma survivors will have completed treatment within two months. Follow-up is stated by survivors themselves, why confusion about date of diagnosis and date of completed treatment can have happened (suggested by the lead author).

| FLZMb-sex<br>How satisfied are you with the area of your life: Sexuality? |                            |      |             |
|---------------------------------------------------------------------------|----------------------------|------|-------------|
|                                                                           | Frequency, no of survivors | %    | Cumulated % |
| Unsatisfied                                                               | 4                          | 9.1  | 9.1         |
| Somewhat unsatisfied                                                      | 13                         | 29.5 | 38.6        |
| Somewhat satisfied                                                        | 10                         | 22.7 | 61.4        |
| Satisfied                                                                 | 12                         | 27.3 | 88.6        |
| Very satisfied                                                            | 5                          | 11.4 | 100         |

| FLZ<br>With my physical attraction I am... |                                  |      |             |
|--------------------------------------------|----------------------------------|------|-------------|
|                                            | Frequency,<br>no of<br>survivors | %    | Cumulated % |
| Very unsatisfied                           | 1                                | 2.3  | 2.3         |
| Unsatisfied                                | 3                                | 6.8  | 9.1         |
| Somewhat unsatisfied                       | 9                                | 20.5 | 29.5        |
| Neither satisfied or unsatisfied           | 3                                | 6.8  | 36.4        |
| Somewhat satisfied                         | 11                               | 25.0 | 61.4        |
| Satisfied                                  | 14                               | 31.8 | 93.2        |
| Very satisfied                             | 3                                | 6.8  | 100         |

| FLZ<br>With my sexual efficiency I am... |                                  |      |             |
|------------------------------------------|----------------------------------|------|-------------|
|                                          | Frequency,<br>no of<br>survivors | %    | Cumulated % |
| Very unsatisfied                         | 1                                | 2.3  | 2.3         |
| Unsatisfied                              | 4                                | 9.1  | 11.4        |
| Somewhat unsatisfied                     | 4                                | 9.1  | 20.5        |
| Neither satisfied or unsatisfied         | 6                                | 13.6 | 34.1        |
| Somewhat satisfied                       | 15                               | 34.1 | 68.2        |
| Satisfied                                | 12                               | 27.3 | 95.5        |
| Very satisfied                           | 2                                | 4.5  | 100         |

| FLZ<br>With the frequency of my sexual contacts I am.. |                                  |      |             |
|--------------------------------------------------------|----------------------------------|------|-------------|
|                                                        | Frequency,<br>no of<br>survivors | %    | Cumulated % |
| Very unsatisfied                                       | 3                                | 6.8  | 6.8         |
| Unsatisfied                                            | 9                                | 20.5 | 27.3        |
| Somewhat unsatisfied                                   | 7                                | 15.9 | 43.2        |
| Neither satisfied or unsatisfied                       | 5                                | 11.4 | 54.5        |
| Somewhat satisfied                                     | 8                                | 18.2 | 72.7        |
| Satisfied                                              | 11                               | 25.0 | 97.7        |
| Very satisfied                                         | 1                                | 2.3  | 100         |

| FLZ<br>With the frequency of my physical partners attentiveness towards me I am...<br>(39/44 survivors answered this question) |                                  |      |             |
|--------------------------------------------------------------------------------------------------------------------------------|----------------------------------|------|-------------|
|                                                                                                                                | Frequency,<br>no of<br>survivors | %    | Cumulated % |
| Very unsatisfied                                                                                                               | 4                                | 9.1  | 10.3        |
| Unsatisfied                                                                                                                    | 6                                | 13.6 | 25.6        |
| Somewhat unsatisfied                                                                                                           | 3                                | 6.8  | 33.3        |
| Neither satisfied or unsatisfied                                                                                               | 7                                | 15.9 | 51.3        |
| Somewhat satisfied                                                                                                             | 7                                | 15.9 | 69.2        |
| Satisfied                                                                                                                      | 6                                | 13.6 | 84.6        |
| Very satisfied                                                                                                                 | 6                                | 13.6 | 100         |

| FLZ<br>With With my sexual reactions I am... |                                  |      |             |
|----------------------------------------------|----------------------------------|------|-------------|
|                                              | Frequency,<br>no of<br>survivors | %    | Cumulated % |
| Unsatisfied                                  | 2                                | 4.5  | 4.5         |
| Somewhat unsatisfied                         | 6                                | 13.6 | 18.2        |
| Neither satisfied or unsatisfied             | 5                                | 11.4 | 29.5        |
| Somewhat satisfied                           | 15                               | 34.1 | 63.6        |
| Satisfied                                    | 12                               | 27.3 | 90.9        |
| Very satisfied                               | 4                                | 9.1  | 100         |

| FLZ<br>When I think how impartial I can speak about sexuality I am.. |                                  |      |             |
|----------------------------------------------------------------------|----------------------------------|------|-------------|
|                                                                      | Frequency,<br>no of<br>survivors | %    | Cumulated % |
| Unsatisfied                                                          | 2                                | 4.5  | 4.5         |
| Somewhat unsatisfied                                                 | 1                                | 2.3  | 6.8         |
| Neither satisfied or unsatisfied                                     | 5                                | 11.4 | 18.2        |
| Somewhat satisfied                                                   | 9                                | 20.5 | 38.6        |
| Satisfied                                                            | 19                               | 43.2 | 81.8        |
| Very satisfied                                                       | 8                                | 18.2 | 100         |

| FLZ                                                                |                                  |      |             |
|--------------------------------------------------------------------|----------------------------------|------|-------------|
| When I think how my partner and I are in line in sexuality I am... |                                  |      |             |
| (40/44 survivors answered this question)                           |                                  |      |             |
|                                                                    | Frequency,<br>no of<br>survivors | %    | Cumulated % |
| Very unsatisfied                                                   | 3                                | 6.8  | 7.5         |
| Unsatisfied                                                        | 3                                | 6.8  | 15.0        |
| Somewhat unsatisfied                                               | 5                                | 11.4 | 27.5        |
| Neither satisfied or unsatisfied                                   | 8                                | 18.2 | 47.5        |
| Somewhat satisfied                                                 | 8                                | 18.2 | 67.5        |
| Satisfied                                                          | 12                               | 27.3 | 97.5        |
| Very satisfied                                                     | 1                                | 2.3  | 100         |
