# Supplementary material for: Sexual health and testosterone concentration in male lymphoma survivors: A systematic review
Source: PubMed Central journal article supplement — Heliyon. 2024 Jun 4;10(11):e31915. doi: 10.1016/j.heliyon.2024.e31915 (PMC11219276; doi:10.1016/j.heliyon.2024.e31915), 2024-06-04
Supplement: mmc6.pdf [file mmc6.pdf]

# Sexual health and testosterone concentration in male lymphoma survivors: A systematic review

Supplementary material provided by Tsatsou et al.

Sexual Function of Male Survivors of Hematological Malignancy Treated by Autologous Hematopoietic Stem Cell Transplantation: A Multicenter Controlled Observational Study

Tsatsou, Ioanna  
Mystakidou, Kyriaki  
Adamakidou, Theodoula  
Konstantinidis, Theocharis  
Kalemikerakis, Ioannis  
Galanos, Antonis  
Prapa, Paraskevi Maria  
Panagou, Eleni  
Govina, Ourania

## Supplementary data for adult men with Hodgkin and non-Hodgkin lymphoma:

### Total IIEF score:

NHL Mean±SD=58.06±18.20

HL Mean±SD=62.37±13.22

### Subscale erection:

|                             |                             |
|-----------------------------|-----------------------------|
| Controls Mean±SD=26.72±5.74 | 25,7% had a score below 26  |
| NHL Mean±SD=24.125±7.88     | 43,75% had a score below 26 |
| HL Mean±SD= 26.235 ± 5.51   | 35,31% had a score below 26 |

### Age at diagnosis:

Lymphoma Mean±SD=40±12.23 (range 18-50)

### Age at transplant:

Lymphoma Mean±SD=40±10.75 (range 19-55)

### Age at follow-up:

NHL Mean±SD= 42.29±12.7

HL Mean±SD=35.65±8.7

### Median time since transplant:

Mean±SD in years = 3,13±1,55 (range 1-5 years)

**Missing data:**

The study was thoroughly explained to the subjects, who then completed the questionnaire. In addition, the researcher was available to the participant to resolve any questions related to the questions. As a result, we had no missing data.
